# Supplementary material for: Effect of the Addition of Humic Substances as Growth Promoter in Broiler Chickens Under Two Feeding Regimens
Source: PubMed Central journal article supplement (PMC6940755; doi:10.3390/ani9121101), 2019-12-09
Supplement: animals-09-01101-s001.pdf [file animals-09-01101-s001.pdf]

**Supplementary Table 1.** The relative intensity of the main band and associated functional groups of infrared spectra of the extract of humic substances (EHS) <sup>1</sup>.

| Wave number, cm <sup>-1</sup> | Functional groups                                                                                                                                |
|-------------------------------|--------------------------------------------------------------------------------------------------------------------------------------------------|
| 3500-3250                     | OH extension of alcoholic and phenolic-OH, small contributions of NH <sub>2</sub> , -CO-NH, S-H, and P-H                                         |
| 3000-2800                     | CH <sub>3</sub> and -CH <sub>2</sub> aliphatic groups (symmetric and asymmetric extension of -OH groups)                                         |
| 1800-1600                     | C=O extension in lactones and NH <sub>2</sub> in amides - contribution of nitrates (R-O-NO <sub>2</sub> ), nitrites [R-O-NO)                     |
| 1569                          | Pyridine derivatives - an extension of double rings                                                                                              |
| 1408                          | CH <sub>2</sub> and CH <sub>3</sub> in aliphatic compounds, the vibration of bending CH <sub>2</sub> , asymmetric deformation of CH <sub>3</sub> |
| 1210                          | C-O and OH of COOH, C-O of aryl-ethers and phenols                                                                                               |
| 1118                          | C-O-C in aliphatic ethers, asymmetric extension                                                                                                  |
| 1025                          | Si-O-Si - asymmetric extension, C-O in polysaccharides and S=O in alkyl sulfoxides                                                               |
| 848                           | Trisubstituted benzene, deformation of CH out of the plane, balancing of Si-CH <sub>3</sub>                                                      |
| 774                           | Multisubstituted benzene, C-Cl extension                                                                                                         |

<sup>1</sup> All spectra were collected in a range of 4000-400 cm<sup>-1</sup>, with a resolution of 4 cm<sup>-1</sup>, using 32 scans per sample
